# Supplementary material
Source: Springer Nature journal article supplement (https://www.springermedizin.de/resource/supplementary/12913_2012_2699_MOESM1_ESM.pdf/9531166)
Supplement: MOESM1 [file 9531166]

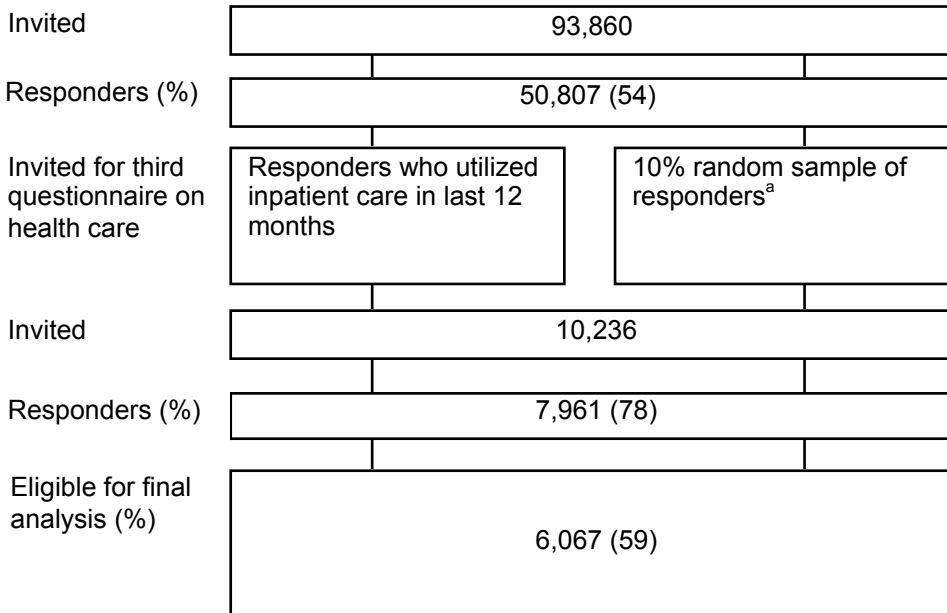

<sup>a</sup> Invitees were excluded if selected for more than two high-priority questionnaires (cancer, cardiovascular, diabetes)
